# Supplementary material for: Constraining Light Dependency in Modeled Emissions Through Comparison to Observed BVOC Concentrations in a Southeastern US Forest
Source: Copernicus journal article supplement (doi:10.5194/egusphere-2024-1715), 2024-06-18
Supplement: Supplementary file 1 [file egusphere-2024-1715-supplement.pdf]

## S1: Emission Factors for VFRL

**Table S1.** Emission factors for grid cell at standard conditions.

| Categories                             | Emission Factor<br>( $nmol.m^{-2}.s^{-1}$ ) |
|----------------------------------------|---------------------------------------------|
| isoprene                               | 15.16                                       |
| MBO                                    | 0.46                                        |
| pinenes                                | 0.27                                        |
| ocimenes                               | 0.22                                        |
| carene                                 | 0.20                                        |
| limonene                               | 0.21                                        |
| cymene                                 | 0.03                                        |
| camphor                                | 0.05                                        |
| b-caryophyllene                        | 0.07                                        |
| longifolene                            | 0.04                                        |
| methanol                               | 1.60                                        |
| acetone                                | 0.40                                        |
| acetaldehyde and ethanol               | 0.70                                        |
| formic acid; acetic acid; pyruvic acid | 0.40                                        |
| ethene; ethane                         | 1.27                                        |
| methacrolein                           | 0.10                                        |
| linalool                               | 0.20                                        |
| other VOC                              | 0.04                                        |
| CO                                     | 1                                           |

## S2: Tree Species composition at VFRL

**Table S2.** Tree species composition at VFRL with the fraction of the grid occupied by the corresponding species.

| Species                        | Grid Fraction | Type            |
|--------------------------------|---------------|-----------------|
| <i>Quercus alba</i>            | 0.2364        | Broadleaf tree  |
| <i>Pinus virginiana</i>        | 0.2006        | Needleleaf tree |
| <i>Quercus falcata</i>         | 0.1186        | Broadleaf tree  |
| <i>Acer rubrum</i>             | 0.1146        | Broadleaf tree  |
| <i>Liriodendron tulipifera</i> | 0.1026        | Broadleaf tree  |
| <i>Carya</i>                   | 0.0453        | Broadleaf tree  |
| <i>Fagus grandifolia</i>       | 0.0443        | Broadleaf tree  |
| <i>Quercus rubra</i>           | 0.0389        | Broadleaf tree  |
| <i>Pinus taeda</i>             | 0.0277        | Needleleaf tree |
| <i>Liquidambar styraciflua</i> | 0.02          | Broadleaf tree  |
| <i>Nyssa sylvatica</i>         | 0.0178        | Broadleaf tree  |
| <i>Quercus marilandica</i>     | 0.0104        | Broadleaf tree  |
| <i>Cornus florida</i>          | 0.008         | Broadleaf tree  |
| <i>Juniperus virginiana</i>    | 0.0047        | Needleleaf tree |
| <i>Quercus prinus</i>          | 0.0025        | Broadleaf tree  |
| <i>Sassafras albidum</i>       | 0.0018        | Broadleaf tree  |
| <i>Platanus occidentalis</i>   | 0.0018        | Broadleaf tree  |
| <i>Populus deltoides</i>       | 0.0015        | Broadleaf tree  |
| <i>Carpinus caroliniana</i>    | 0.0012        | Broadleaf tree  |
| <i>Quercus stellata</i>        | 0.0008        | Broadleaf tree  |
| <i>Ilex opaca</i>              | 0.0002        | Broadleaf tree  |
| <i>Castanea pumila</i>         | 0.0001        | Broadleaf tree  |

### S3: Correlation of meteorological data at VFRL with those from Weather Underground

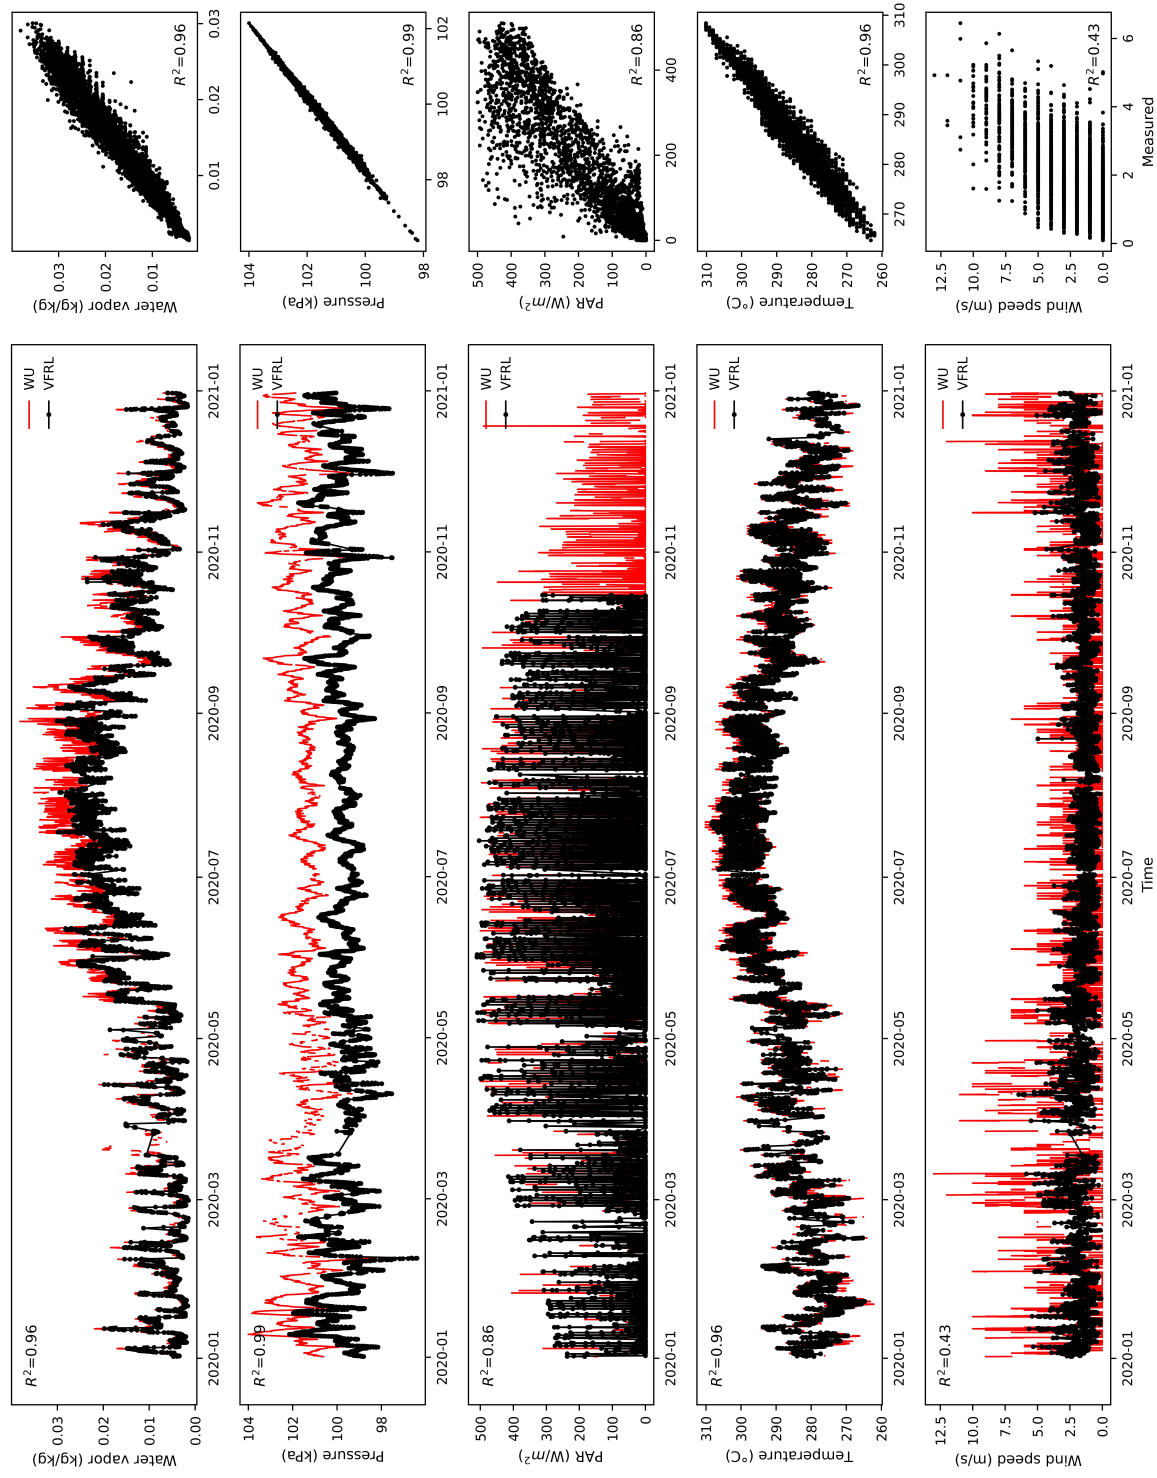

**Figure S3.** Timeseries of meteorological parameters measured at the Virginia Forest Research Laboratory (VFRL, black lines) and those obtained from Weather Underground identifiers as mentioned in Section 2.2 (in red). The Pearson Correlation coefficient is denoted by  $R^2$ .

#### S4: Timeseries of $\alpha$ -pinene with adjusted LDF values.

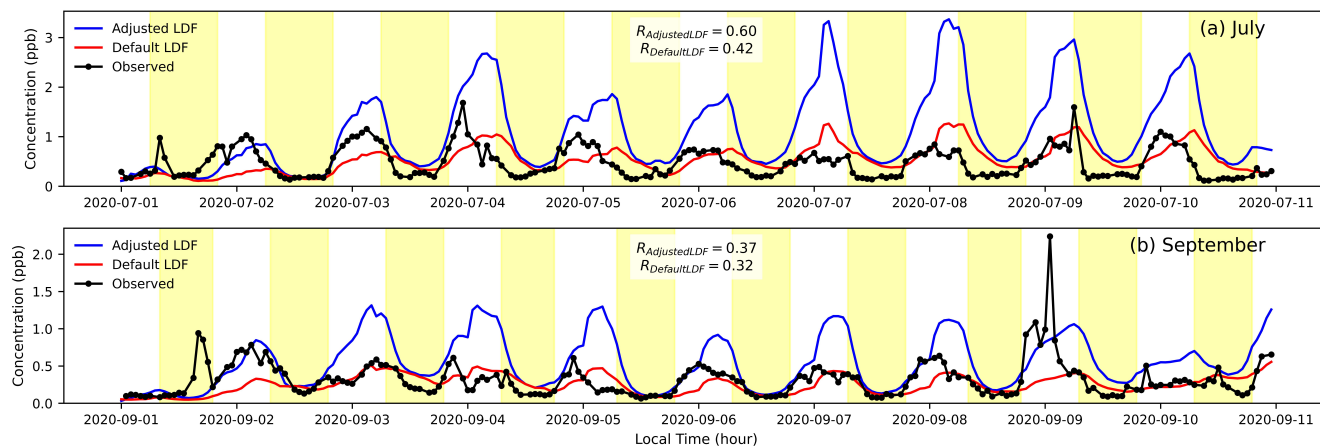

**Figure S4.** A snapshot of  $\alpha$ -pinene concentrations (in ppb) for January, July, and September of 2020 using the monthly LDF as shown in Figure 6. The Pearson correlation coefficient values of the adjusted and default modeled (refer to Table 1) concentrations against the observed concentrations are reported as  $R_{\text{AdjustedLDF}}$  and  $R_{\text{DefaultLDF}}$ .

#### S5: Rates of reaction for additional BVOCs added to MCMv3.3.1.

**Table S5.** Rates of reaction of BVOCs added to MCMv3.3.1 where  $k_{\text{OH}\cdot\text{i}}$  and  $k_{\text{O}_3\cdot\text{i}}$  are the second order reaction rates of compound *emphi* with OH and O<sub>3</sub> in  $\text{cm}^3\cdot\text{molecule}^{-1}\cdot\text{s}^{-1}$

| Compound (i)          | $k_{\text{O}_3\cdot\text{i}}$<br>( $\text{cm}^3\cdot\text{molecule}^{-1}\cdot\text{s}^{-1}$ ) | $k_{\text{OH}\cdot\text{i}}$<br>( $\text{cm}^3\cdot\text{molecule}^{-1}\cdot\text{s}^{-1}$ ) | References                    |
|-----------------------|-----------------------------------------------------------------------------------------------|----------------------------------------------------------------------------------------------|-------------------------------|
| $\beta$ -phellandrene | $4.77 \times 10^{-17}$                                                                        | $1.68 \times 10^{-10}$                                                                       | Shorees et al. (1991)         |
| Camphene              | $5.10 \times 10^{-19}$                                                                        | $5.30 \times 10^{-11}$                                                                       | Gaona-Colmán et al. (2017)    |
| Tricyclene            | None                                                                                          | $3.54 \times 10^{-12}$                                                                       | US EPA (2024)                 |
| $\beta$ -Thujene      | $1.13 \times 10^{-17}$                                                                        | $6.09 \times 10^{-11}$                                                                       | US EPA (2024)                 |
| $\alpha$ -Fenchene    | $1.13 \times 10^{-17}$                                                                        | $5.96 \times 10^{-11}$                                                                       | US EPA (2024)                 |
| Sabinene              | $8.60 \times 10^{-17}$                                                                        | $1.17 \times 10^{-10}$                                                                       | Atkinson et al. (1990b, a)    |
| $\alpha$ -Cymene      | None                                                                                          | $8.54 \times 10^{-12}$                                                                       | US EPA (2024)                 |
| $\gamma$ -terpinene   | $1.40 \times 10^{-16}$                                                                        | $1.77 \times 10^{-10}$                                                                       | Atkinson et al. (1990b)       |
| $\alpha$ -Cedrene     | $2.78 \times 10^{-17}$                                                                        | $6.70 \times 10^{-11}$                                                                       | Shu and Atkinson (1994, 1995) |
| $\beta$ -cedrene      | $1.70 \times 10^{-16}$                                                                        | $6.53 \times 10^{-11}$                                                                       | Richters et al. (2015)        |



## 5 S6: Monthly variation of LDF throughout the year for other BVOCs.

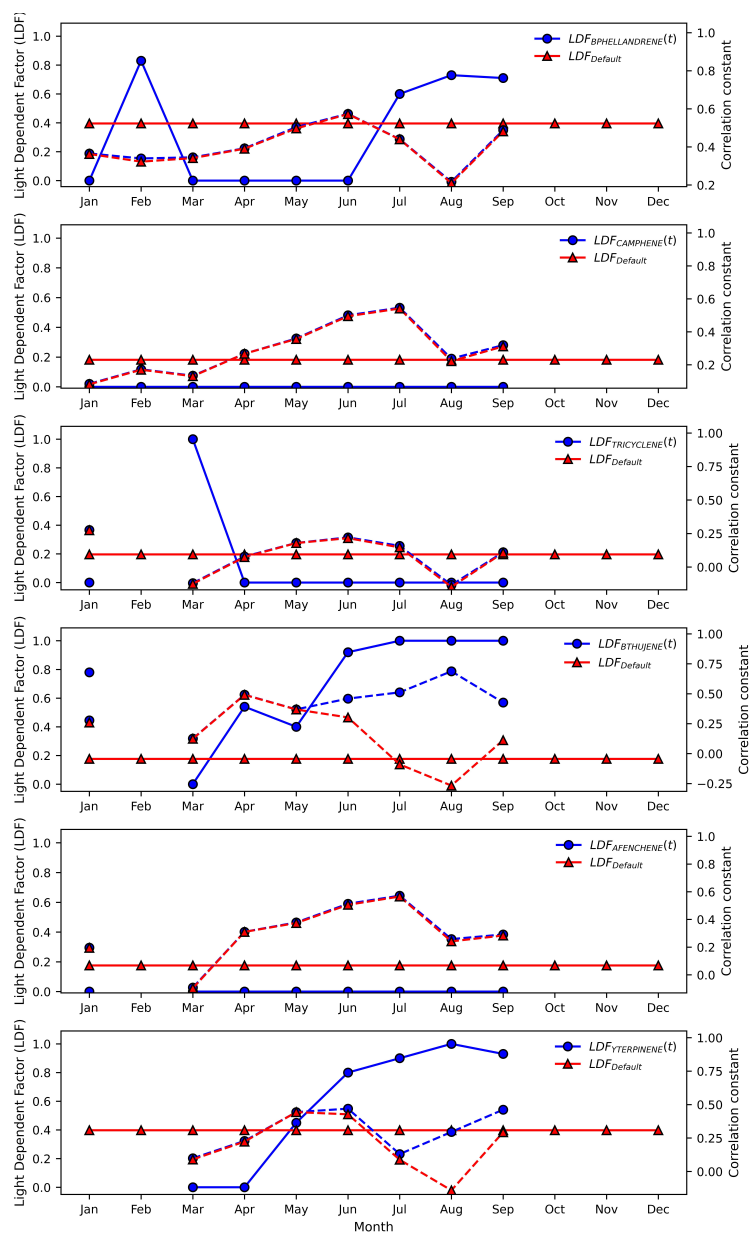

**Figure S6.** Monthly variation of LDF for  $\alpha$ -fenchene,  $\beta$ -phellandrene,  $\beta$ -thujene, camphene, tricyclene and  $\gamma$ -terpinene estimated by maximizing the correlation between observed concentrations and those estimated by MEGANv3.2 and FOAM at VFRL. The blue markers represent the adjusted LDF values, the red line represents the LDF used by default in MEGANv3.2. The blue and red dashed lines present the LDF values and the dashed lines represent the corresponding Pearson correlation coefficients.

**S7: Variation of correlation constant with LDF throughout the seasons for all BVOCs simulated.**

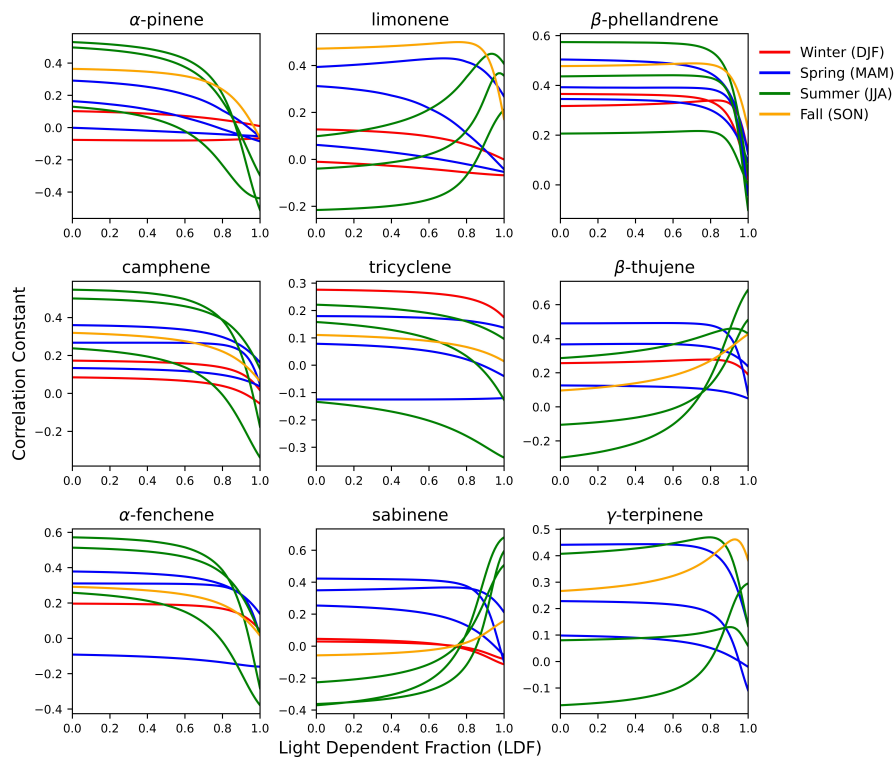

**Figure S7.** Variation of the Pearson correlation coefficient between modeled and measured concentration with LDF for  $\alpha$ -pinene, limonene,  $\beta$ -phellandrene, camphene, tricyclene,  $\beta$ -thujene,  $\alpha$ -fenchene, sabinene, and  $\gamma$ -terpinene at VFRL. The red lines represent winter (Dec, Jan, Feb), blue lines spring (Mar, Apr, May), green lines summer (Jun, Jul, Aug), and orange lines fall (Sep, Oct, Nov) months.

## References

- Atkinson, R., Aschmann, S. M., and Arey, J.: Rate constants for the gas-phase reactions of OH and NO<sub>3</sub> radicals and O<sub>3</sub> with sabinene and camphene at 296±2 K, *Atmospheric Environment. Part A. General Topics*, 24, 2647–2654, 1990a.
- 10 Atkinson, R., Hasegawa, D., and Aschmann, S. M.: Rate constants for the gas-phase reactions of O<sub>3</sub> with a series of monoterpenes and related compounds at 296±2 K, *International Journal of Chemical Kinetics*, 22, 871–887, 1990b.
- Gaona-Colmán, E., Blanco, M. B., Barnes, I., Wiesen, P., and Teruel, M. A.: OH-and O<sub>3</sub>-initiated atmospheric degradation of camphene: temperature dependent rate coefficients, product yields and mechanisms, *RSC advances*, 7, 2733–2744, 2017.
- Richters, S., Herrmann, H., and Berndt, T.: Gas-phase rate coefficients of the reaction of ozone with four sesquiterpenes at 295±2 K, *Physical*  
15 *Chemistry Chemical Physics*, 17, 11 658–11 669, 2015.
- Shorees, B., Atkinson, R., and Arey, J.: Kinetics of the gas-phase reactions of β-phellandrene with OH and NO<sub>3</sub> radicals and O<sub>3</sub> at 297±2 K, *International journal of chemical kinetics*, 23, 897–906, 1991.
- Shu, Y. and Atkinson, R.: Rate constants for the gas-phase reactions of O<sub>3</sub> with a series of terpenes and OH radical formation from the O<sub>3</sub> reactions with sesquiterpenes at 296±2 K, *International Journal of Chemical Kinetics*, 26, 1193–1205, 1994.
- 20 Shu, Y. and Atkinson, R.: Atmospheric lifetimes and fates of a series of sesquiterpenes, *Journal of Geophysical Research: Atmospheres*, 100, 7275–7281, 1995.
- US EPA: Estimation Programs Interface Suite™ AopWin v1.92 for Microsoft® Windows, United States Environmental Protection Agency, Washington, DC, US, 2024.
